# Supplementary material for: Integrated profiling identifies SLC5A6 and MFAP2 as novel diagnostic and prognostic biomarkers in gastric cancer patients
Source: PubMed Central journal article supplement — Int J Oncol. 2019 Dec 16;56(2):460–9. doi: 10.3892/ijo.2019.4944 (PMC6959404; doi:10.3892/ijo.2019.4944), 2019-12-16

Figure S1. Flow chart of data preparation, processing, analysis and validation as performed in the current study. GO, Gene Ontology; KEGG, Kyoto Encyclopedia of Genes and Genomes.

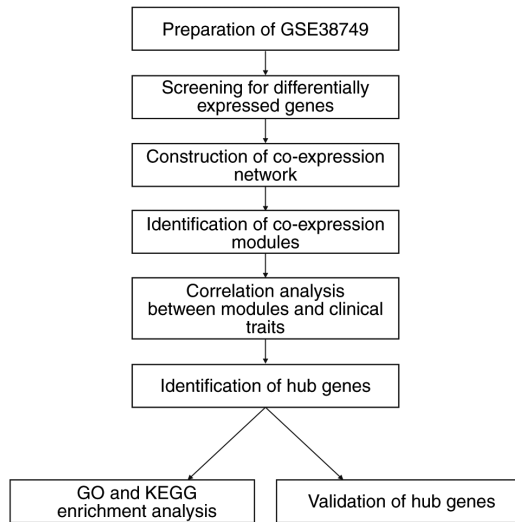

Supplement: Supplementary_Data.pdf [file Supplementary_Data.pdf]
